# Supplementary material for: Activation of the Endonuclease that Defines mRNA 3′ Ends Requires Incorporation into an 8-Subunit Core Cleavage and Polyadenylation Factor Complex
Source: PubMed Central journal article supplement (PMC6436931; doi:10.1016/j.molcel.2018.12.023), 2019-03-21
Supplement: mmc1.pdf [file mmc1.pdf]

**Molecular Cell, Volume 73**

**Supplemental Information**

**Activation of the Endonuclease that Defines mRNA**

**3' Ends Requires Incorporation into an 8-Subunit**

**Core Cleavage and Polyadenylation Factor Complex**

**Chris H. Hill, Vytautė Boreikaitė, Ananthanarayanan Kumar, Ana Casañal, Peter Kubík, Gianluca Degliesposti, Sarah Maslen, Angelica Mariani, Otilie von Loeffelholz, Mathias Girbig, Mark Skehel, and Lori A. Passmore**

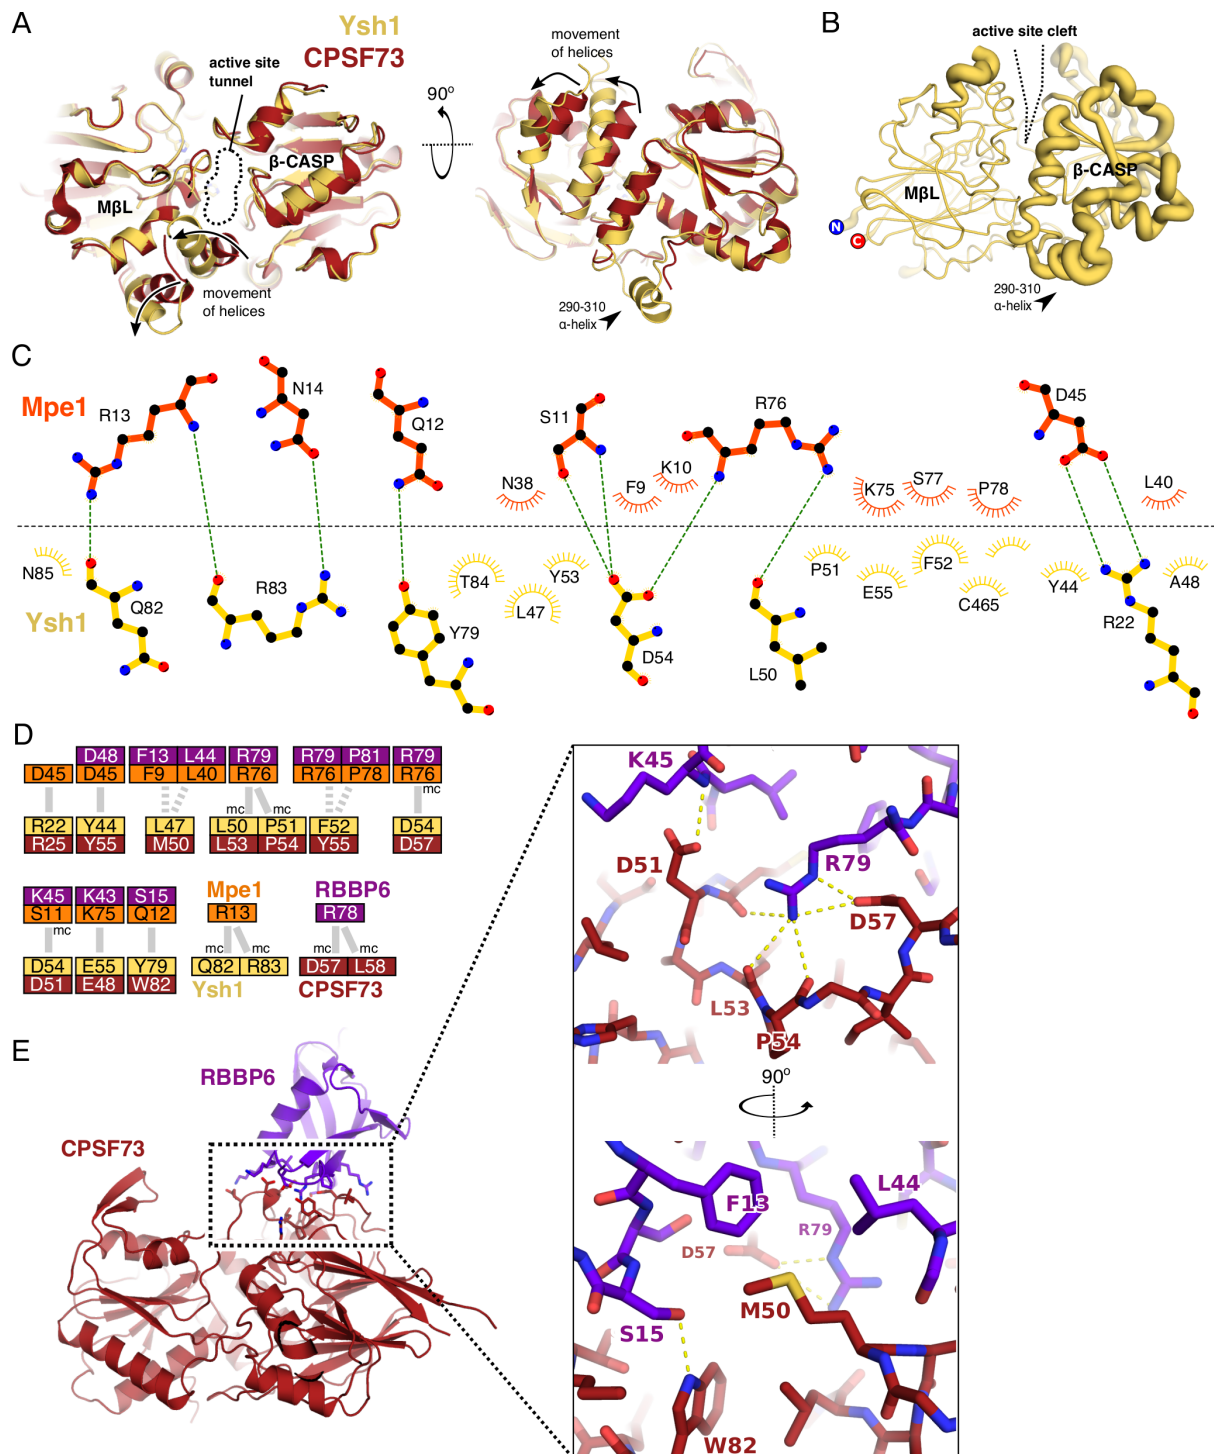

**Figure S1. Details of the Ysh1–Mpe1 X-ray crystal structure. Related to Figure 1.**

(A) Secondary structure-based alignment of yeast Ysh1 (yellow; this study) with human CPSF73 (red; Mandel et al., 2006). Two orthogonal views are shown. The structure of yeast Ysh1 is similar to CPSF73 (RMSD = 0.73 Å over 2390 atoms) and yeast Cft2 (RMSD = 3.65 Å over 1735 atoms). (B) Cartoon representation of the Ysh1 N-terminal catalytic domain, in which ribbon thickness is proportional to atomic *B* factor. (C) Summary of the intermolecular interactions at the Ysh1–Mpe1 interface. Hydrogen bonds and electrostatic interactions are represented by green dashed lines. Hydrophobic interactions are indicated by fans. (D) Diagram illustrating conservation of the interface in yeast and human proteins. Interacting residues are shown as yellow (Ysh1) and orange (Mpe1) blocks. Hydrogen bonds or ionic interactions between side chains are depicted by solid grey lines, and ‘mc’ denotes that main chain atoms are involved. Dashed grey lines represent hydrophobic interactions. Equivalent interactions between conserved or similar residues in human orthologues CPSF73

(dark red) and RBBP6 (purple) are shown next to the relevant yeast residues. (E) Ribbon diagram showing structures of CPSF73 and RBBP6 docked together based on the Ysh1–Mpe1 structure. Details of the residues at the interaction interface are shown in two orthogonal views. Polar contacts are indicated by dashed yellow lines. These docking experiments suggest that this interface may be conserved in human CPSF73 and RBBP6, in agreement with a previously identified role for RBBP6 in pre-mRNA 3' end processing (Di Giammartino et al., 2014).

**Figure S2 (opposite). Details of hydrogen-deuterium exchange (HDX), cross-link mass spectrometry and cryo EM. Related to Figure 2.**

(A) Map of Ysh1, Mpe1 and Yjr141w sequence coverage in HDX experiments. Individual peptides are indicated by blue bars on the primary sequence. We were unable to purify isolated full-length Ysh1 so we instead performed a pair-wise analysis, comparing Ysh1 peptides from the Ysh1–Mpe1–Yjr141w trimer to equivalent peptides in the Ysh1–Mpe1 and Ysh1–Yjr141w dimers (B) Butterfly plot showing relative incorporation of deuterium into Ysh1 peptides at four different time-points, comparing Ysh1–Mpe1–Yjr141w (top) to Ysh1–Yjr141w (bottom). The corresponding difference plot indicates Ysh1 peptides that are affected by Mpe1 binding, and is shown in Figure 2B. (C) Butterfly plot as in (B) but comparing Ysh1–Mpe1–Yjr141w (top) to Ysh1–Mpe1 (bottom). The corresponding difference plot indicates Ysh1 peptides that are affected by Yjr141w binding, and is shown in Figure 2C. The relative fractional uptake of deuterium was generally higher in peptides from the Ysh1 C-terminal domain compared to peptides from the N-terminal catalytic domain, implying that the C-terminal domain is relatively disordered in the absence of other CPF subunits. (D) Plot from the Ysh1–Mpe1 sample showing relative incorporation of deuterium into Mpe1 peptides at four different time-points. Domains are color-coded as in Figure 1. This suggests that the only well-ordered regions are the N-terminal UBL and C-terminal RING domains. This flexibility may explain the crosslinks between the Ysh1 C-terminal domain and Mpe1 (Figure 2A), which are often observed in regions of proteins that are able to sample a larger conformational space. (E) Plot from the Ysh1–Yjr141w sample showing relative incorporation of deuterium into Yjr141w peptides at four different time-points. This did not reveal any obvious ordered domains. (B–E), triplicate data from four independent time-points are shown. Grey shading indicates the standard deviation of all charge states and replicates per peptide. (F) Residues indicated to be in close-proximity by cross-linking mass spectrometry experiments (Figure 2A) are mapped onto the crystal structure. Crosslinks are indicated by purple dashed lines. (G) Exploded view of the Ysh1–Mpe1 X-ray crystal structure. Residues highlighted in red are more protected from hydrogen-deuterium exchange when full-length Mpe1 is present (see Figure 2B). Residues 37–55 of Ysh1 interact directly with Mpe1 but it is not obvious from the crystal structure why residues 207–469 are protected by Mpe1 binding. We hypothesize that there are additional transient interactions with other parts of Mpe1 (that were absent in the construct used for crystallization) in this region of Ysh1. (H) Three orthogonal views showing the angular distribution of particles in the 3D cryo-EM reconstruction of the Ysh1–Mpe1–Yjr141w sample. A strongly preferred orientation is present. (I) Gold-standard Fourier shell correlation (FSC) curve for the Ysh1–Mpe1 cryo-EM map. (J) Point spread function (PSF) for the Ysh1–Mpe1 cryo-EM map, calculated in cryoEF (Naydenova and Russo, 2017). The efficiency of orientation distribution ( $E_{OD}$ ) is 0.29, the mean PSF resolution is 4.7 Å, and the anisotropic PSF resolution is 2.1 Å – 8.51 Å (Naydenova and Russo, 2017).





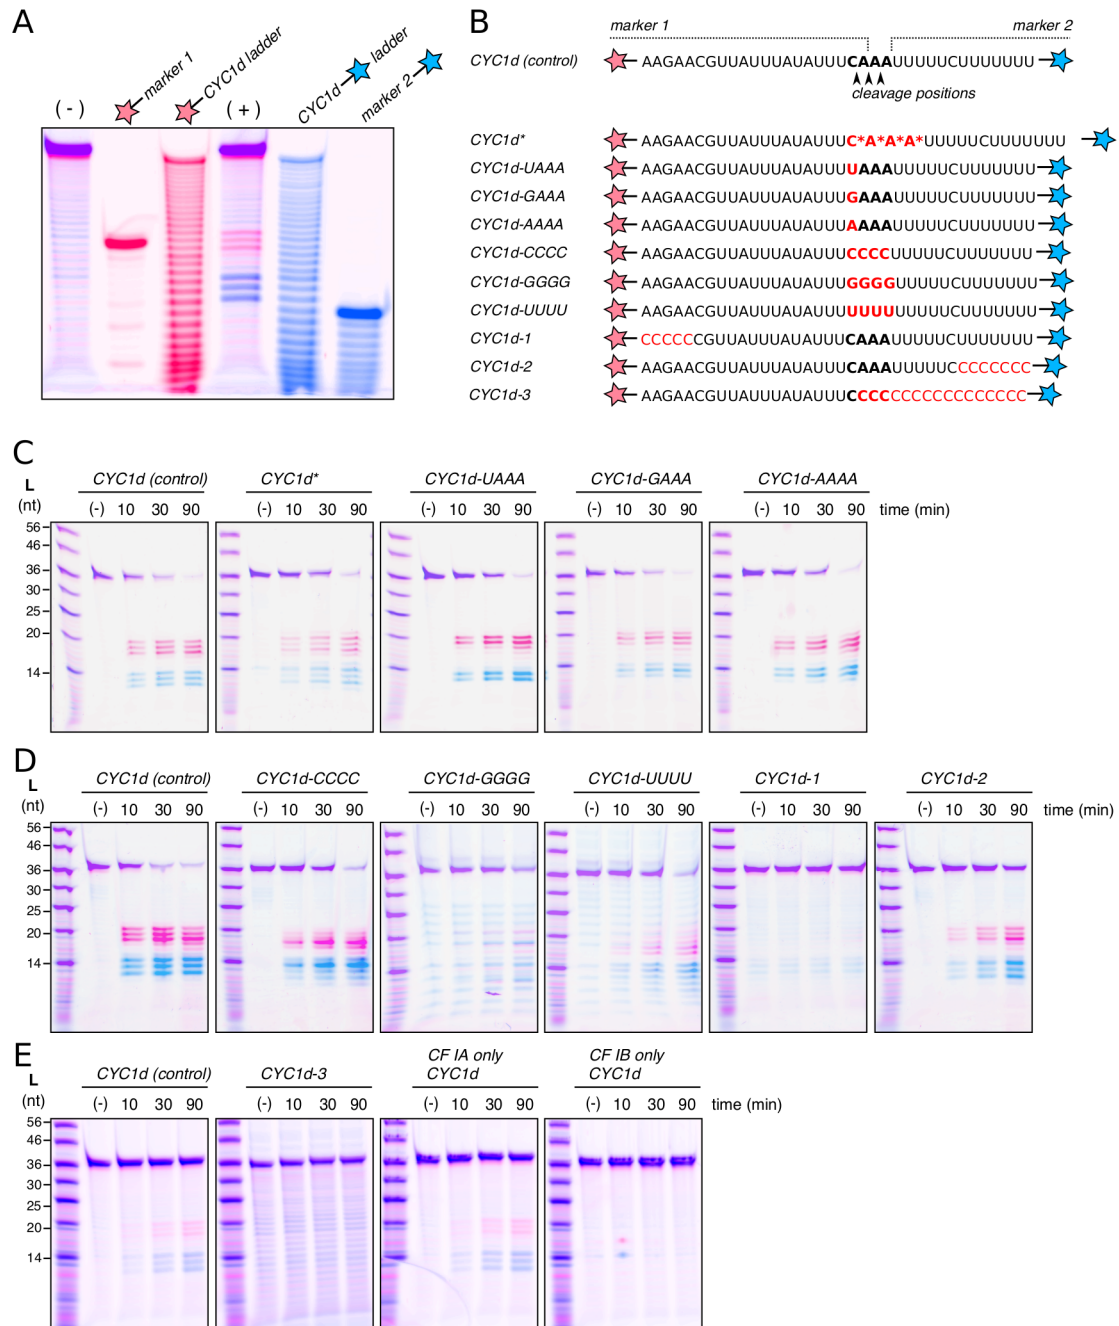

**Figure S4. Effect of sequence changes on the cleavage of *CYC1* 3'-UTR short sequences. Related to Figure 4.**

(A) Urea-PAGE analysis of cleavage assays performed using the fluorescently-labelled *CYC1d* substrate, run alongside fluorescent fiducial RNA markers (see panel B) and alkaline hydrolysis ladders to determine the exact cleavage location. The lane marked (+) is loaded with a reaction containing CPF<sub>core</sub>, CF IA and CF IB. The negative control reaction (-) contained CF IA and CF IB only. (B) Sequences of RNA substrates derived from the *CYC1* 3'-UTR. Each substrate carries both 5'-FAM and 3'-A647 labels (red and blue stars, respectively). The canonical cleavage site is highlighted in bold, and wedges denote the experimentally determined cleavage locations. Fiducial markers used in (A) are indicated above the sequence. Mutated nucleotides are in red. A star represents a phosphothioate bond, which is cleaved more slowly. (C - E) Urea-PAGE analysis of cleavage assays of the above substrates in the presence of CPF<sub>core</sub>, CF IA and CF IB. Each gel should be compared to the positive control (left) from the same batch of experiments. The negative control reactions (-) contained CF IA and CF IB, but not CPF<sub>core</sub> and were incubated for the duration of the longest time point.

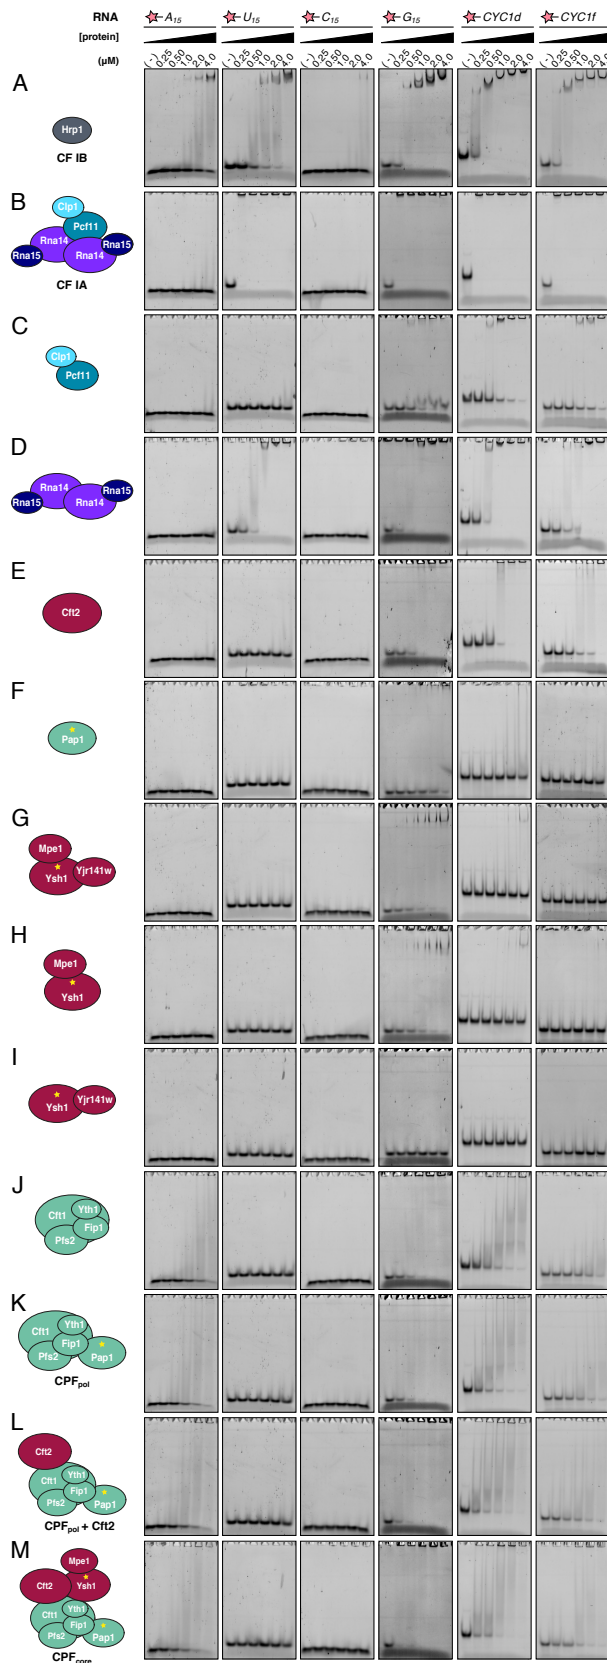

**Figure S5. RNA binding by CPF<sub>core</sub> and cleavage factor sub-components. Related to Figure 4 and Table 3.**

EMSA performed with homopolymeric 15-mers of A, U, C and G, as well as *CYC1d* and *CYC1f* short RNAs. Proteins and sub-complexes tested were (A) CF IB, (B) CF IA, (C) Pcf11–Clp1, (D) Rna14–Rna15, (E) Cft2, (F) Pap1, (G) Ysh1–Mpe1–Yjr141w, (H) Ysh1–Mpe1, (I) Ysh1–Yjr141w, (J) CPF<sub>pol</sub> lacking Pap1, (K) CPF<sub>pol</sub>, (L) CPF<sub>pol</sub>+Cft2 and (M) CPF<sub>core</sub>. A summary of these results is in Table 3.

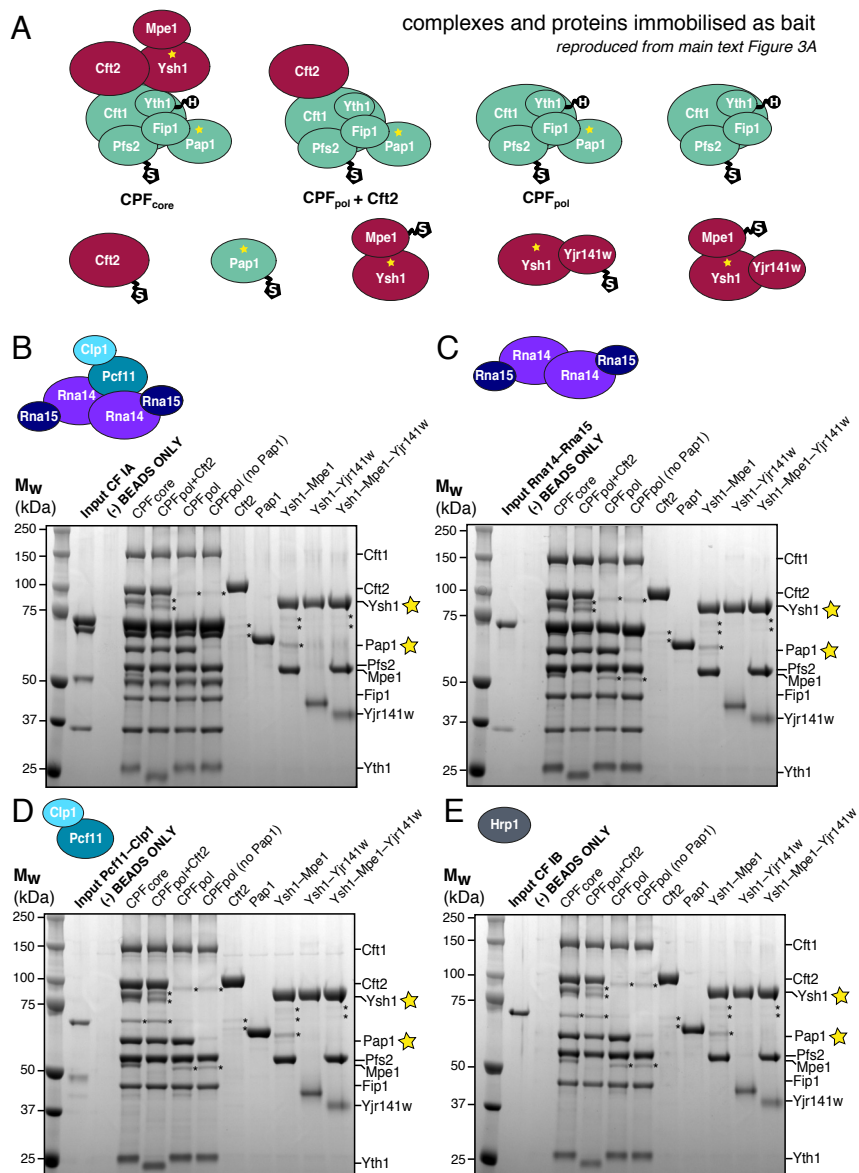

**Figure S6. CF IA is recruited to CPF<sub>core</sub> via interactions between Rna14–Rna15 and the polymerase module. Related to Figure 4.**

Given that the accessory cleavage factors are indispensable for activation of the nuclease, we performed a series of pull-down experiments to map their ability to bind to different components of CPF<sub>core</sub>. Pull-downs were performed using CPF proteins and complexes depicted in Figure 3A. To avoid misleading results caused by misfolded or aggregated proteins, we only used StreptII-tagged ‘bait’ proteins purified by anion exchange and size exclusion chromatography (Figure 3A). These were immobilized on strep-affinity resin and binding to untagged ‘prey’ complexes CF IA, Rna14–15, Pcf11–Clp1 and CF IB was analyzed. SDS-PAGE analyses of the bait-loaded resin after incubation with prey and four washes are shown. In all cases, the input lane contains the purified ‘prey’ proteins that were added. As a negative control (-) ‘beads only’ experiment, prey proteins were added to Streptactin resin without bait. Asterisks indicate contaminant proteins. CF IA and Rna14–15 bound tightly to complexes containing the polymerase module (with and without Pap1), as we had shown before (Casañal et al., 2017), but not to other proteins. In contrast, no CPF complexes interacted with Pcf11–Clp1 or CF IB. This indicates that the polymerase module is the primary component of core CPF that interacts directly with Rna14–Rna15 to recruit CF IA to the complex, and may also explain why CF IA activates cleavage to a greater extent than CF IB (Figure S3B).



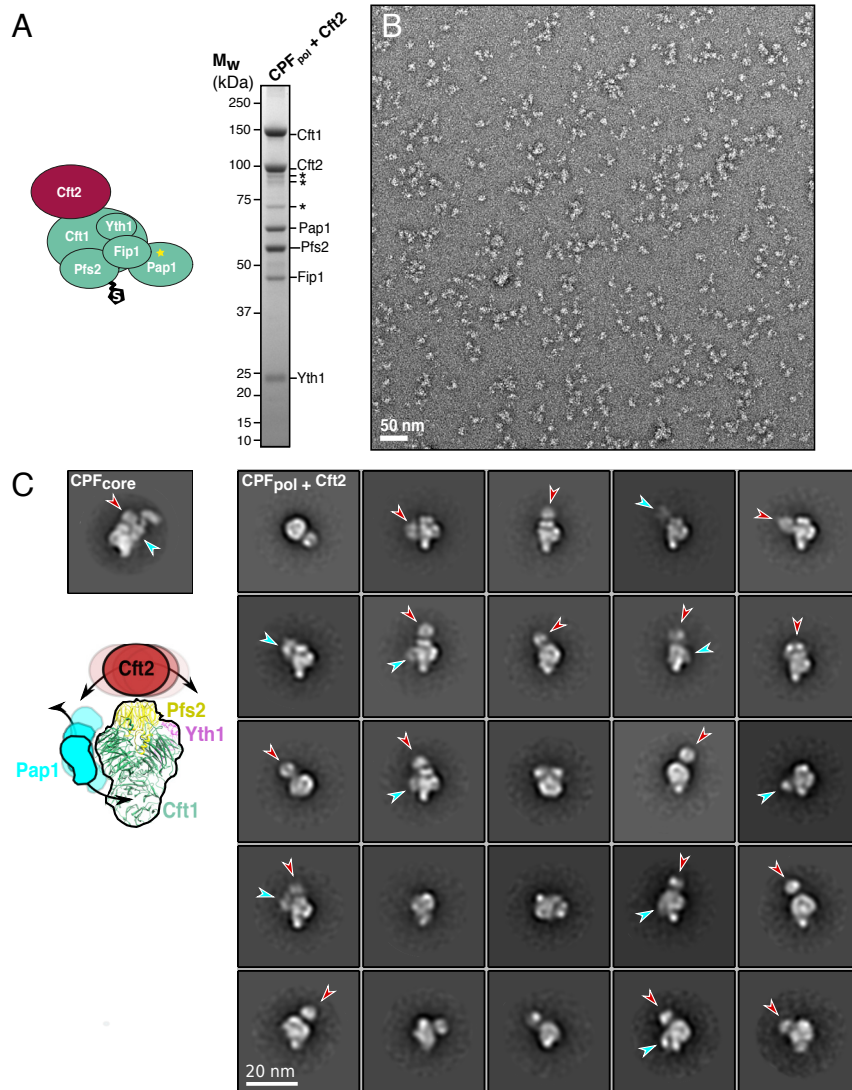

**Figure S7. Mapping of Cft2 in CPF<sub>core</sub> negative stain density. Related to Figure 5.**

(A) To validate our low-resolution model of CPF<sub>core</sub>, and in particular the positioning of Ysh1–Mpe1, we expressed and purified a version of CPF<sub>core</sub> in which Ysh1 and Mpe1 were absent, i.e. the five-subunit polymerase module plus Cft2 (CPF<sub>pol</sub>+Cft2). SDS-PAGE analysis of the purified complex is shown. Asterisks indicate contaminant proteins. (B) Representative negative stain micrograph of CPF<sub>pol</sub>+Cft2 particles. (C) 2D class averages of CPF<sub>pol</sub>+Cft2, compared to the predominant 21 nm particle present in CPF<sub>core</sub> (see Figure 5C). This is consistent with our model for CPF<sub>core</sub> because the hook-like globular density that we had assigned as Mpe1 and Ysh1 was missing. Omission of Ysh1 and Mpe1 appears to cause more conformational variability: the polymerase module is visible in each class with mobile extra densities. These are likely Cft2 (red arrowhead) and Pap1 (blue arrowhead), based on the shape of the densities. These data suggest that Mpe1 and Ysh1 have a role in stabilizing the overall assembly.

**Table S1** Summary of Crosslink-MS experiments. Related to Figure 2.

| Protein 1 | Res 1 | Protein 2 | Res2 | Mpe1:Ysh1 |     | YJR141W:Ysh1 |     | Mpe1:Ysh1:YJR141W |     |
|-----------|-------|-----------|------|-----------|-----|--------------|-----|-------------------|-----|
|           |       |           |      | BuUrBu    | DSS | BuUrBu       | DSS | BuUrBu            | DSS |
| Mpe1      | 10    | Ysh1      | 6    | X         |     |              |     |                   |     |
| Mpe1      | 10    | Ysh1      | 10   | X         |     |              |     | X                 |     |
| Mpe1      | 39    | Ysh1      | 119  |           |     |              |     |                   | X   |
| Mpe1      | 75    | YJR141W   | 60   |           |     |              |     |                   | X   |
| Mpe1      | 75    | Ysh1      | 4    |           |     |              |     | X                 |     |
| Mpe1      | 75    | Ysh1      | 10   | X         | X   |              |     | X                 |     |
| Mpe1      | 75    | Ysh1      | 13   |           |     |              |     | X                 |     |
| Mpe1      | 75    | Ysh1      | 578  |           | X   |              |     |                   |     |
| Mpe1      | 77    | Ysh1      | 440  |           | X   |              |     |                   |     |
| Mpe1      | 81    | Ysh1      | 440  |           |     |              |     | X                 |     |
| Mpe1      | 82    | Ysh1      | 440  |           |     |              |     | X                 |     |
| Mpe1      | 90    | Ysh1      | 100  |           | X   |              |     |                   |     |
| Mpe1      | 90    | Ysh1      | 228  |           | X   |              |     |                   |     |
| Mpe1      | 90    | Ysh1      | 440  | X         | X   |              |     | X                 | X   |
| Mpe1      | 90    | Ysh1      | 445  | X         |     |              |     | X                 |     |
| Mpe1      | 90    | Ysh1      | 508  |           |     |              |     |                   | X   |
| Mpe1      | 90    | Ysh1      | 701  | X         | X   |              |     | X                 |     |
| Mpe1      | 90    | Ysh1      | 761  |           | X   |              |     |                   |     |
| Mpe1      | 114   | Ysh1      | 116  |           |     |              |     |                   | X   |
| Mpe1      | 114   | Ysh1      | 117  |           | X   |              |     |                   |     |
| Mpe1      | 114   | Ysh1      | 119  |           | X   |              |     |                   |     |
| Mpe1      | 114   | Ysh1      | 226  | X         | X   |              |     | X                 |     |
| Mpe1      | 114   | Ysh1      | 578  |           | X   |              |     |                   |     |
| Mpe1      | 114   | Ysh1      | 583  |           | X   |              |     |                   |     |
| Mpe1      | 114   | Ysh1      | 701  | X         | X   |              |     |                   |     |
| Mpe1      | 114   | Ysh1      | 704  |           | X   |              |     |                   |     |
| Mpe1      | 206   | Ysh1      | 226  | X         | X   |              |     | X                 |     |
| Mpe1      | 216   | YJR141W   | 141  |           |     |              |     |                   | X   |
| Mpe1      | 263   | Ysh1      | 226  | X         |     |              |     |                   |     |
| Mpe1      | 303   | Ysh1      | 440  |           |     |              |     | X                 |     |
| Mpe1      | 303   | Ysh1      | 451  | X         |     |              |     | X                 |     |
| Mpe1      | 304   | Ysh1      | 451  |           | X   |              |     |                   | X   |
| Mpe1      | 305   | Ysh1      | 451  |           | X   |              |     |                   | X   |
| Mpe1      | 348   | YJR141W   | 225  |           |     |              |     |                   | X   |
| YJR141W   | 83    | Ysh1      | 97   |           |     |              | X   |                   |     |
| YJR141W   | 84    | Ysh1      | 96   |           |     | X            |     |                   |     |
| YJR141W   | 84    | Ysh1      | 100  |           |     | X            |     |                   |     |
| YJR141W   | 97    | Ysh1      | 761  |           |     |              |     | X                 |     |
| YJR141W   | 98    | Ysh1      | 701  |           |     |              |     | X                 | X   |
| YJR141W   | 98    | Ysh1      | 761  |           |     |              |     |                   | X   |
| YJR141W   | 99    | Ysh1      | 701  |           |     |              | X   |                   |     |
| YJR141W   | 99    | Ysh1      | 761  |           |     | X            |     |                   |     |
| YJR141W   | 100   | Ysh1      | 122  |           |     |              | X   |                   |     |
| YJR141W   | 100   | Ysh1      | 123  |           |     |              | X   |                   |     |
| YJR141W   | 100   | Ysh1      | 701  |           |     | X            | X   |                   |     |
| YJR141W   | 153   | Ysh1      | 701  |           |     |              |     | X                 | X   |
| YJR141W   | 155   | Ysh1      | 701  |           |     | X            |     |                   |     |
| YJR141W   | 163   | Ysh1      | 701  |           |     |              |     | X                 |     |
| YJR141W   | 165   | Ysh1      | 701  |           |     | X            | X   |                   |     |

**Table S2** Oligonucleotide sequences. Related to Figure 4 and STAR Methods.

| <b>RNAs</b>                                                                                                                                                                                                                                                                                                                                                                                                                                                                                      | <b>SOURCE / REF</b>   |
|--------------------------------------------------------------------------------------------------------------------------------------------------------------------------------------------------------------------------------------------------------------------------------------------------------------------------------------------------------------------------------------------------------------------------------------------------------------------------------------------------|-----------------------|
| <p><b>CYC1</b> ‘long’ substrate (used in activity assays):<br/>                     5’ –<br/>                     GGGAGAACAGGCCCUUUUCCUUGUCGAUAUCAUGUAAUUAGUUAUGUCACGCUUA<br/>                     CAUUCACGCCCUCCUCCCAUCCGCUCUAACCGAAAAGGAAGGAGUUAGACAACCUGA<br/>                     AGUCUAGGUCCCUAUUUUUUUUUUUUUUAGUUUAGUUUAGUUAAGAACGUUUUUU<br/>                     AUUUUUCAAUUUUUUUUUUUUUUUCUGUACAAACGCGUGUACGCAUGUAACAUAUA<br/>                     CUGAAAACCUUGCUUGAGAAGGUUUUGGGA – 3’</p> | Casañal et al., 2017  |
| <p><b>CYC1a</b> ‘short’ substrate (used in activity assays):<br/>                     5’ – FAM<br/>                     UUUUAUAGUUAUGUUAGUUAUAAGAACGUUAUUUAUUUUCAAUUUUUUUUUUUUU<br/>                     – A647 3’</p>                                                                                                                                                                                                                                                                           | IDT fluorescent oligo |
| <p><b>CYC1b</b> ‘short’ substrate (used in activity assays):<br/>                     5’ – FAM<br/>                     UGUUAGUUAUAAGAACGUUAUUUAUAUUCAAUUUUUUUUUUUUUCUGUACAGA<br/>                     – A647 3’</p>                                                                                                                                                                                                                                                                             | IDT fluorescent oligo |
| <p><b>CYC1c</b> ‘short’ substrate (used in activity assays):<br/>                     5’ – FAM AAGAACGUUAUUUAUAUUCAAUUUUUUUUUUUUUCUGUACAGA –<br/>                     A647 3’</p>                                                                                                                                                                                                                                                                                                                | IDT fluorescent oligo |
| <p><b>CYC1d</b> ‘short’ substrate (used in activity assays):<br/>                     5’ – FAM AAGAACGUUAUUUAUAUUCAAUUUUUUUUUUUUU – A647 3’</p>                                                                                                                                                                                                                                                                                                                                                  | IDT fluorescent oligo |
| <p><b>CYC1d*</b> ‘short’ substrate (used in activity assays, * indicates phosphothioate bonds)<br/>                     5’ – FAM AAGAACGUUAUUUAUAUUUC*A*A*A*UUUUUUUUUUUUU – A647 3’</p>                                                                                                                                                                                                                                                                                                          | IDT fluorescent oligo |
| <p><b>CYC1d-UAAA</b> ‘short’ substrate (used in activity assays):<br/>                     5’ – FAM AAGAACGUUAUUUAUAUUUAAAUUUUUUUUUUUUU – A647 3’</p>                                                                                                                                                                                                                                                                                                                                            | IDT fluorescent oligo |
| <p><b>CYC1d-GAAA</b> ‘short’ substrate (used in activity assays):<br/>                     5’ – FAM AAGAACGUUAUUUAUAUUUGAAAUUUUUUUUUUUUU – A647 3’</p>                                                                                                                                                                                                                                                                                                                                           | IDT fluorescent oligo |
| <p><b>CYC1d-AAAA</b> ‘short’ substrate (used in activity assays):<br/>                     5’ – FAM AAGAACGUUAUUUAUAUUUAAAAUUUUUUUUUUUUU – A647 3’</p>                                                                                                                                                                                                                                                                                                                                           | IDT fluorescent oligo |
| <p><b>CYC1d-CCCC</b> ‘short’ substrate (used in activity assays):<br/>                     5’ – FAM AAGAACGUUAUUUAUAUUUCCCCUUUUUUUUUUUUU – A647 3’</p>                                                                                                                                                                                                                                                                                                                                           | IDT fluorescent oligo |
| <p><b>CYC1d-GGGG</b> ‘short’ substrate (used in activity assays):<br/>                     5’ – FAM AAGAACGUUAUUUAUAUUUGGGGUUUUUUUUUUUUUU – A647 3’</p>                                                                                                                                                                                                                                                                                                                                          | IDT fluorescent oligo |
| <p><b>CYC1d-UUUU</b> ‘short’ substrate (used in activity assays):<br/>                     5’ – FAM AAGAACGUUAUUUAUAUUUUUUUUUUUUUUUUUUUUUUUUU – A647 3’</p>                                                                                                                                                                                                                                                                                                                                      | IDT fluorescent oligo |
| <p><b>CYC1d-1</b> ‘short’ substrate (used in activity assays):<br/>                     5’ – FAM CCCCCGUUAUUUAUAUUCAAUUUUUUUUUUUUUUU – A647 3’</p>                                                                                                                                                                                                                                                                                                                                               | IDT fluorescent oligo |
| <p><b>CYC1d-2</b> ‘short’ substrate (used in activity assays):<br/>                     5’ – FAM AAGAACGUUAUUUAUAUUCAAUUUUUUUUUUUUUUU – A647 3’</p>                                                                                                                                                                                                                                                                                                                                              | IDT fluorescent oligo |

|                                                                                                                        |                          |
|------------------------------------------------------------------------------------------------------------------------|--------------------------|
| <b>CYC1d-3</b> 'short' substrate (used in activity assays):<br>5' – FAM AAGAACGUUUAUUUAUUUCCCCCCCCCCCCCCC – A647 3'    | IDT fluorescent oligo    |
| <b>CYC1e</b> 'short' substrate (used in activity assays):<br>5' – FAM AAGAACGUUUAUUUAUUUCAAAUUUUUCU A647 – 3'          | IDT fluorescent oligo    |
| <b>CYC1f</b> 'short' substrate (used in activity assays):<br>5' – FAM CGUUUAUUUAUUUCAAAUUUUUCU A647 – 3'               | IDT fluorescent oligo    |
| <b>CYC1g</b> 'short' substrate (used in activity assays):<br>5' – FAM UUUUAUUUCAAAUUUUUCU A647 – 3'                    | IDT fluorescent oligo    |
| <b>CYC1h</b> 'short' substrate (used in activity assays):<br>5' – FAM UUUUCAAUUUUU A647 – 3'                           | IDT fluorescent oligo    |
| <b>A<sub>15</sub> probe</b> (used in EMSA):<br>5' – FAM AAAAAAAAAAAAAA – 3'                                            | IDT fluorescent oligo    |
| <b>U<sub>15</sub> probe</b> (used in EMSA):<br>5' – FAM UUUUUUUUUUUUUU – 3'                                            | IDT fluorescent oligo    |
| <b>C<sub>15</sub> probe</b> (used in EMSA):<br>5' – FAM CCCCCCCCCCCCCC – 3'                                            | IDT fluorescent oligo    |
| <b>G<sub>15</sub> probe</b> (used in EMSA):<br>5' – FAM GGGGGGGGGGGGGG – 3'                                            | IDT fluorescent oligo    |
| <b>CYC1d probe</b> (used in EMSA):<br>5' – FAM AAGAACGUUUAUUUAUUUCAAAUUUUUCUUUUUU – 3'                                 | IDT fluorescent oligo    |
| <b>CYC1f probe</b> (used in EMSA):<br>5' – FAM CGUUUAUUUAUUUCAAAUUUUUCU – 3'                                           | IDT fluorescent oligo    |
| <b>DNA Oligonucleotides</b>                                                                                            | <b>SOURCE / REF</b>      |
| <b>Pap1_F</b> (PCR primer for cloning)<br>5' – AATTGGATCCATGAGCAGCCAGAAAGTTTTT – 3'                                    | Sigma-Aldrich<br>VC00021 |
| <b>Pap1_R</b> (PCR primer for cloning)<br>5' – AATTCTCGAGATTAACATCAACTGCTGCGG – 3'                                     | Sigma-Aldrich<br>VC00021 |
| <b>Cft2_F</b> (PCR primer for cloning)<br>5' – AATTGGATCCATGACCTATAAATACAATTG – 3'                                     | Sigma-Aldrich<br>VC00021 |
| <b>Cft2_R</b> (PCR primer for cloning)<br>5' – AATTCTCGAGAATTTTGGCCAGCATATCTG – 3'                                     | Sigma-Aldrich<br>VC00021 |
| <b>biGBac_pIDS_CasI_F</b> (PCR primer for cloning)<br>5' – AACGCTCTATGGTCTAAAGATTTAAATGGCACCTAGGTATCGATACTAGTATAC – 3' | Sigma-Aldrich<br>VC00021 |
| <b>biGBac_pIDS_CasI_R</b> (PCR primer for cloning)<br>5' – AACCCCGATTGAGATATAGATTTATTTAAATGTACCCGTAGTGCTATG – 3'       | Sigma-Aldrich<br>VC00021 |
| <b>Ysh1-N_F</b> (PCR primer for cloning)<br>5' – AATTGGATCCCTCGAGATGGAACGTACCAATACCAC – 3'                             | Sigma-Aldrich<br>VC00021 |

---

|                                                                                               |                          |
|-----------------------------------------------------------------------------------------------|--------------------------|
| <b>Ysh1-N_R</b> (PCR primer for cloning)<br>5' – AATTTCTAGAGGTACCTTAACCCTGAAATTCCAGATCCA – 3' | Sigma-Aldrich<br>VC00021 |
| <b>Ysh1-C_F</b> (PCR primer for cloning)<br>5' – AATTGGATCCCTCGAGATGGTTAAAGTTGCAAAAGCCGT – 3' | Sigma-Aldrich<br>VC00021 |
| <b>Ysh1-C_R</b> (PCR primer for cloning)<br>5' – AATTTCTAGAGGTACCTTAACACAGCGGTGTAACCA – 3'    | Sigma-Aldrich<br>VC00021 |
| <b>Mpe1-1_F</b> (PCR primer for cloning)<br>5' – AATTGGATCCATGAGCAGCACCATCTTTTATC – 3'        | Sigma-Aldrich<br>VC00021 |
| <b>Mpe1-1_R</b> (PCR primer for cloning)<br>5' – AATTCTCGAGCTGATTACCATCTTTGCTGC – 3'          | Sigma-Aldrich<br>VC00021 |
| <b>Mpe1-2_F</b> (PCR primer for cloning)<br>5' – AATTGGATCCATGAGCAGCACCATCTTTTATC – 3'        | Sigma-Aldrich<br>VC00021 |
| <b>Mpe1-2_R</b> (PCR primer for cloning)<br>5' – AATTCTCGAGATCAATCTGACGATTTTCAC – 3'          | Sigma-Aldrich<br>VC00021 |
| <b>Mpe1-3_F</b> (PCR primer for cloning)<br>5' – AATTGGATCCATGAGCAGCACCATCTTTTATC – 3'        | Sigma-Aldrich<br>VC00021 |
| <b>Mpe1-3_R</b> (PCR primer for cloning)<br>5' – AATTCTCGAGGAAAAAACCGGAGTTGCTGC – 3'          | Sigma-Aldrich<br>VC00021 |
| <b>Mpe1-4_F</b> (PCR primer for cloning)<br>5' – AATTGGATCCATGAAAAGCTTTAGCGTTCATAGC – 3'      | Sigma-Aldrich<br>VC00021 |
| <b>Mpe1-4_R</b> (PCR primer for cloning)<br>5' – AATTCTCGAGTTTTTTCGGGCTTGCATCTG – 3'          | Sigma-Aldrich<br>VC00021 |
| <b>Mpe1-5_F</b> (PCR primer for cloning)<br>5' – AATTGGATCCATGAAAAGCCAGACCAATAAAAAC – 3'      | Sigma-Aldrich<br>VC00021 |
| <b>Mpe1-5_R</b> (PCR primer for cloning)<br>5' – AATTCTCGAGTTTTTTCGGGCTTGCATCTG – 3'          | Sigma-Aldrich<br>VC00021 |

---
